# Supplementary material for: Transcriptomic Analyses and Potential Therapeutic Targets of Pancreatic Cancer With Concomitant Diabetes
Source: Front Oncol. 2020 Nov 4;10:563527. doi: 10.3389/fonc.2020.563527 (PMC7672183; doi:10.3389/fonc.2020.563527)
Supplement: Supplementary file 3 [file Table_3.xlsx]

## Sheet: db-down
Mice		#Kegg_pathway	ko_id	Corrected_P-value
db/db	Up-regulated genes	Systemic lupus erythematosus	ko05322	0.0118422
	Down-regulated genes	NOD-like receptor signaling pathway	ko04621	0.000525045
		Dorso-ventral axis formation	ko04320	0.0336029
STZ	Up-regulated genes	Alanine, aspartate and glutamate metabolism	ko00250	0.00310162
		Glycerolipid metabolism	ko00561	0.00675814
		Rap1 signaling pathway	ko04015	0.0093884
		Ras signaling pathway	ko04014	0.0204805
		Adherens junction	ko04520	0.0308668
		Viral myocarditis	ko05416	0.0416825
	Down-regulated genes	Protein digestion and absorption	ko04974	0.000654053
		ECM-receptor interaction	ko04512	0.01839
		Amoebiasis	ko05146	0.0239749
		Platelet activation	ko04611	0.0386335
		Focal adhesion	ko04510	0.0492601
